# Supplementary material for: Avian influenza H9N2 virus isolated from air samples in LPMs in Jiangxi, China
Source: Springer Nature journal article supplement (doi:10.1186/s12985-017-0800-y), 2017-07-24

a

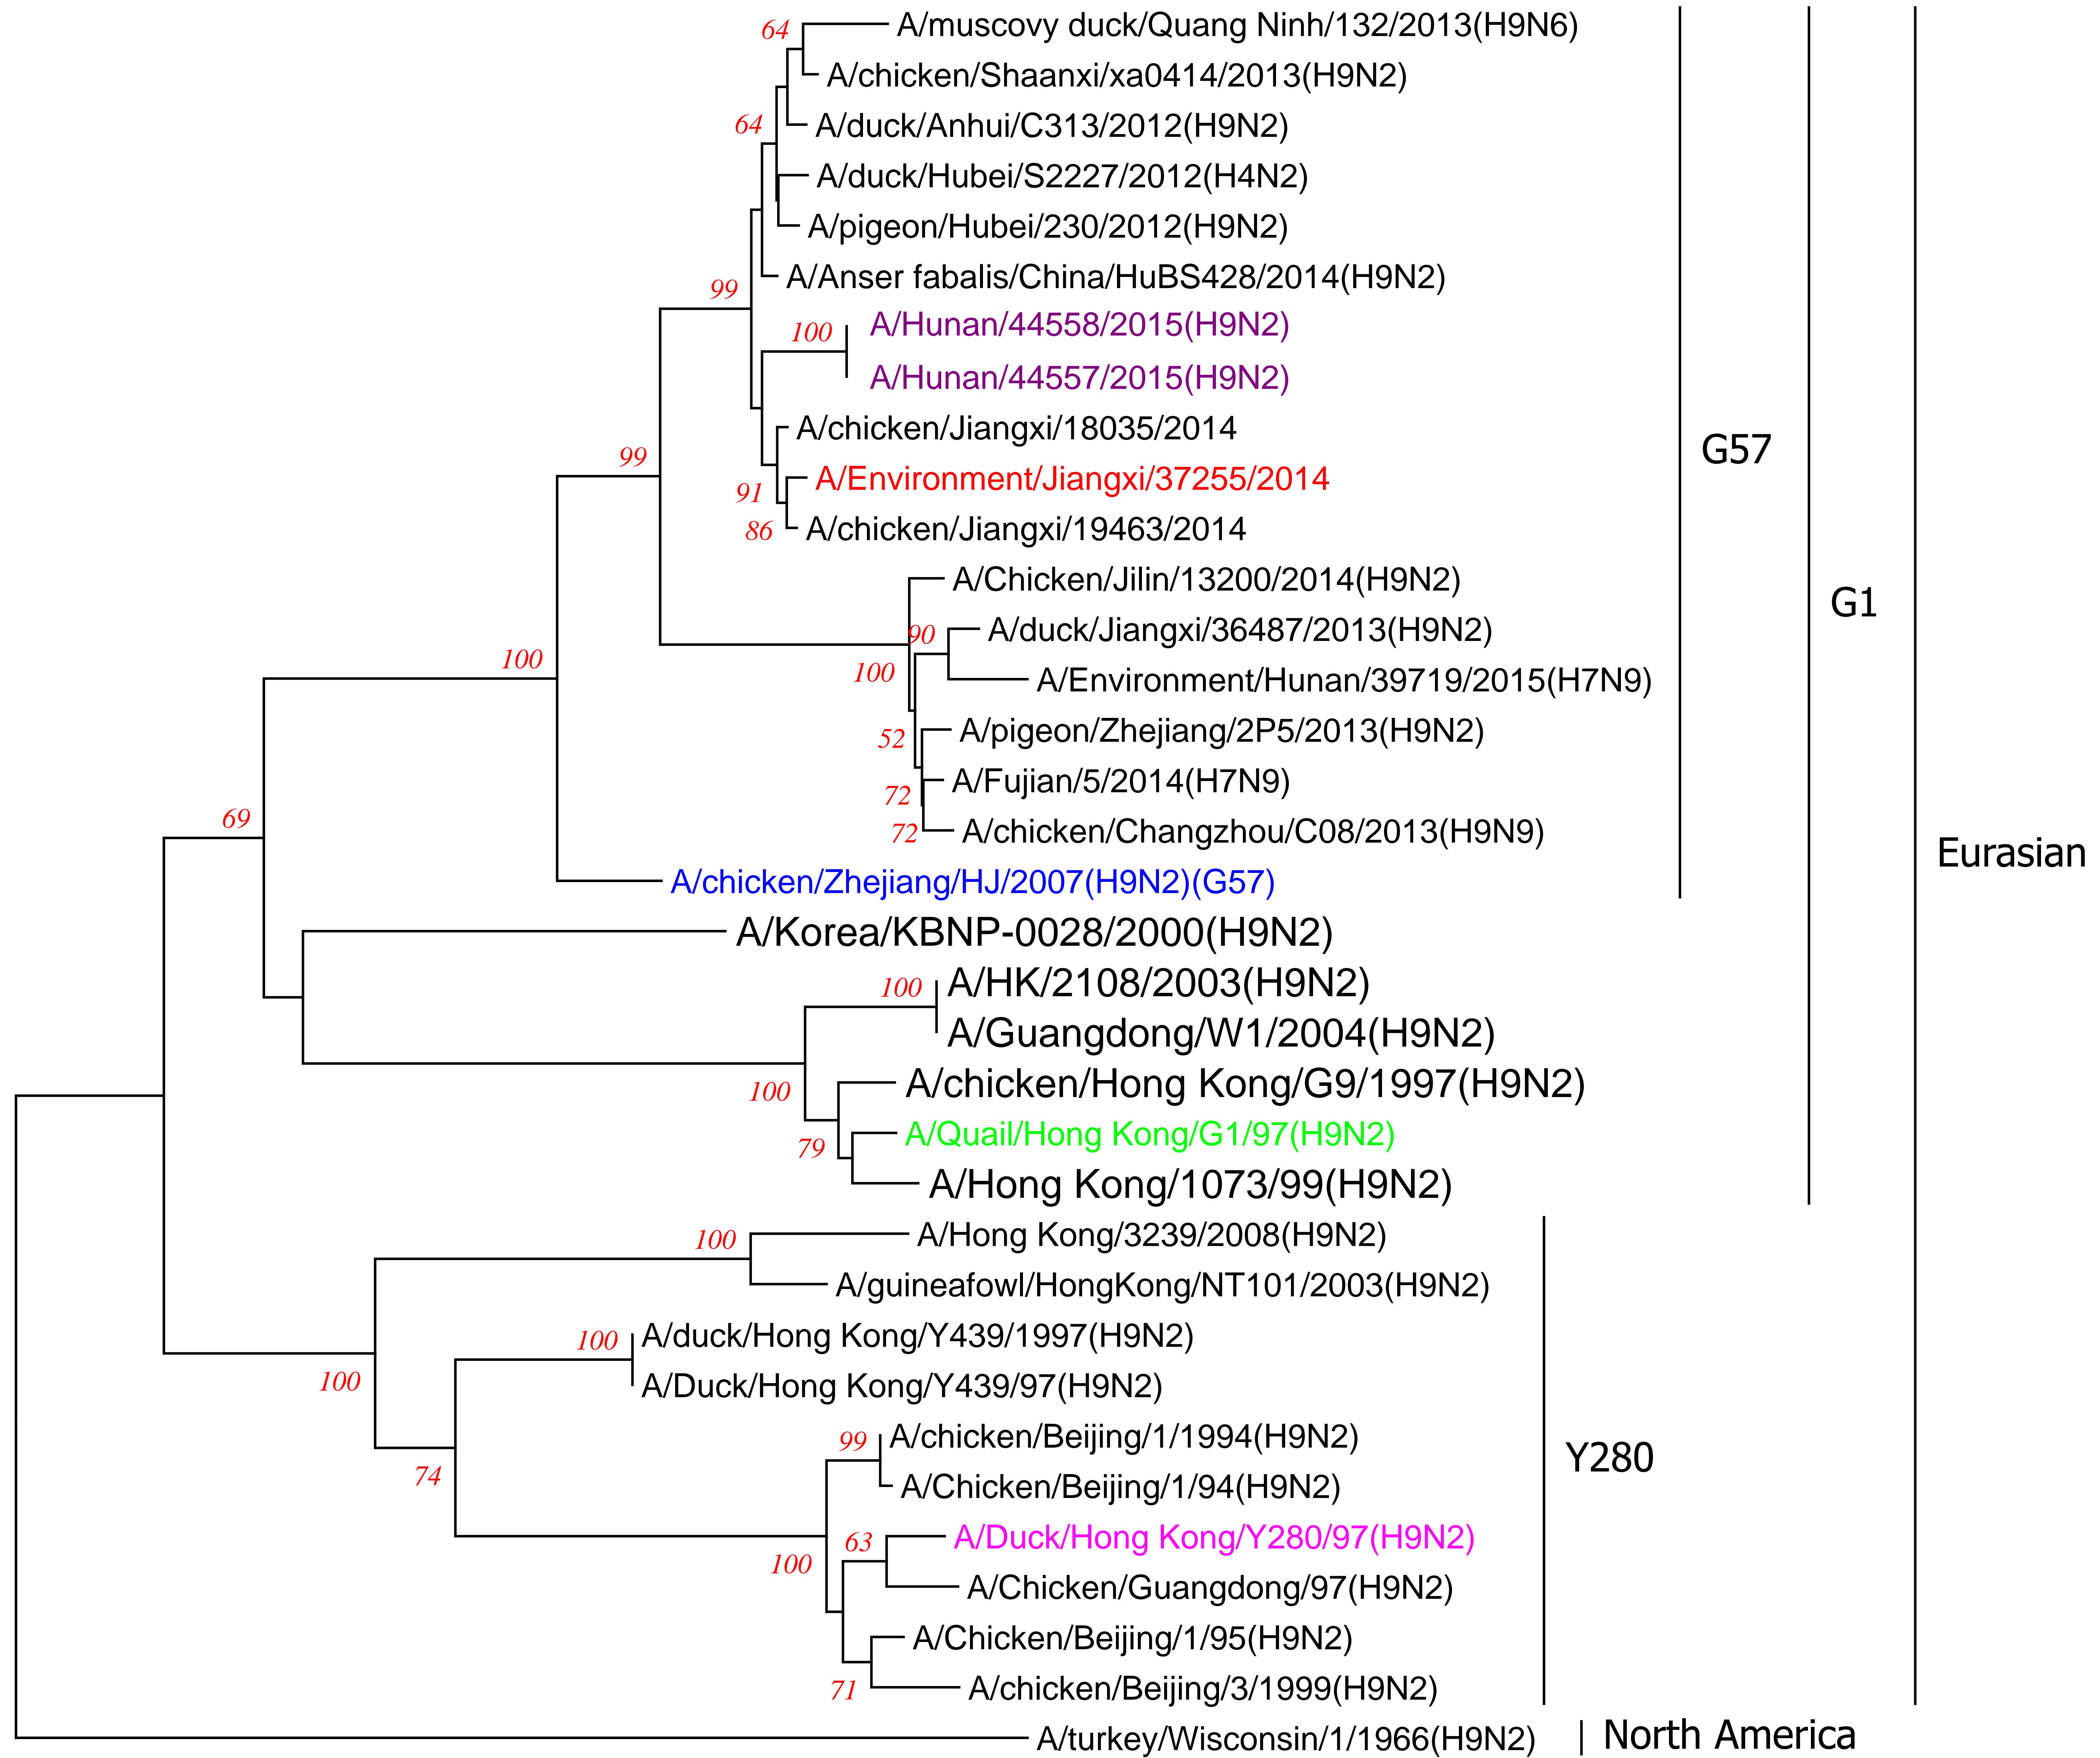

0.02

b

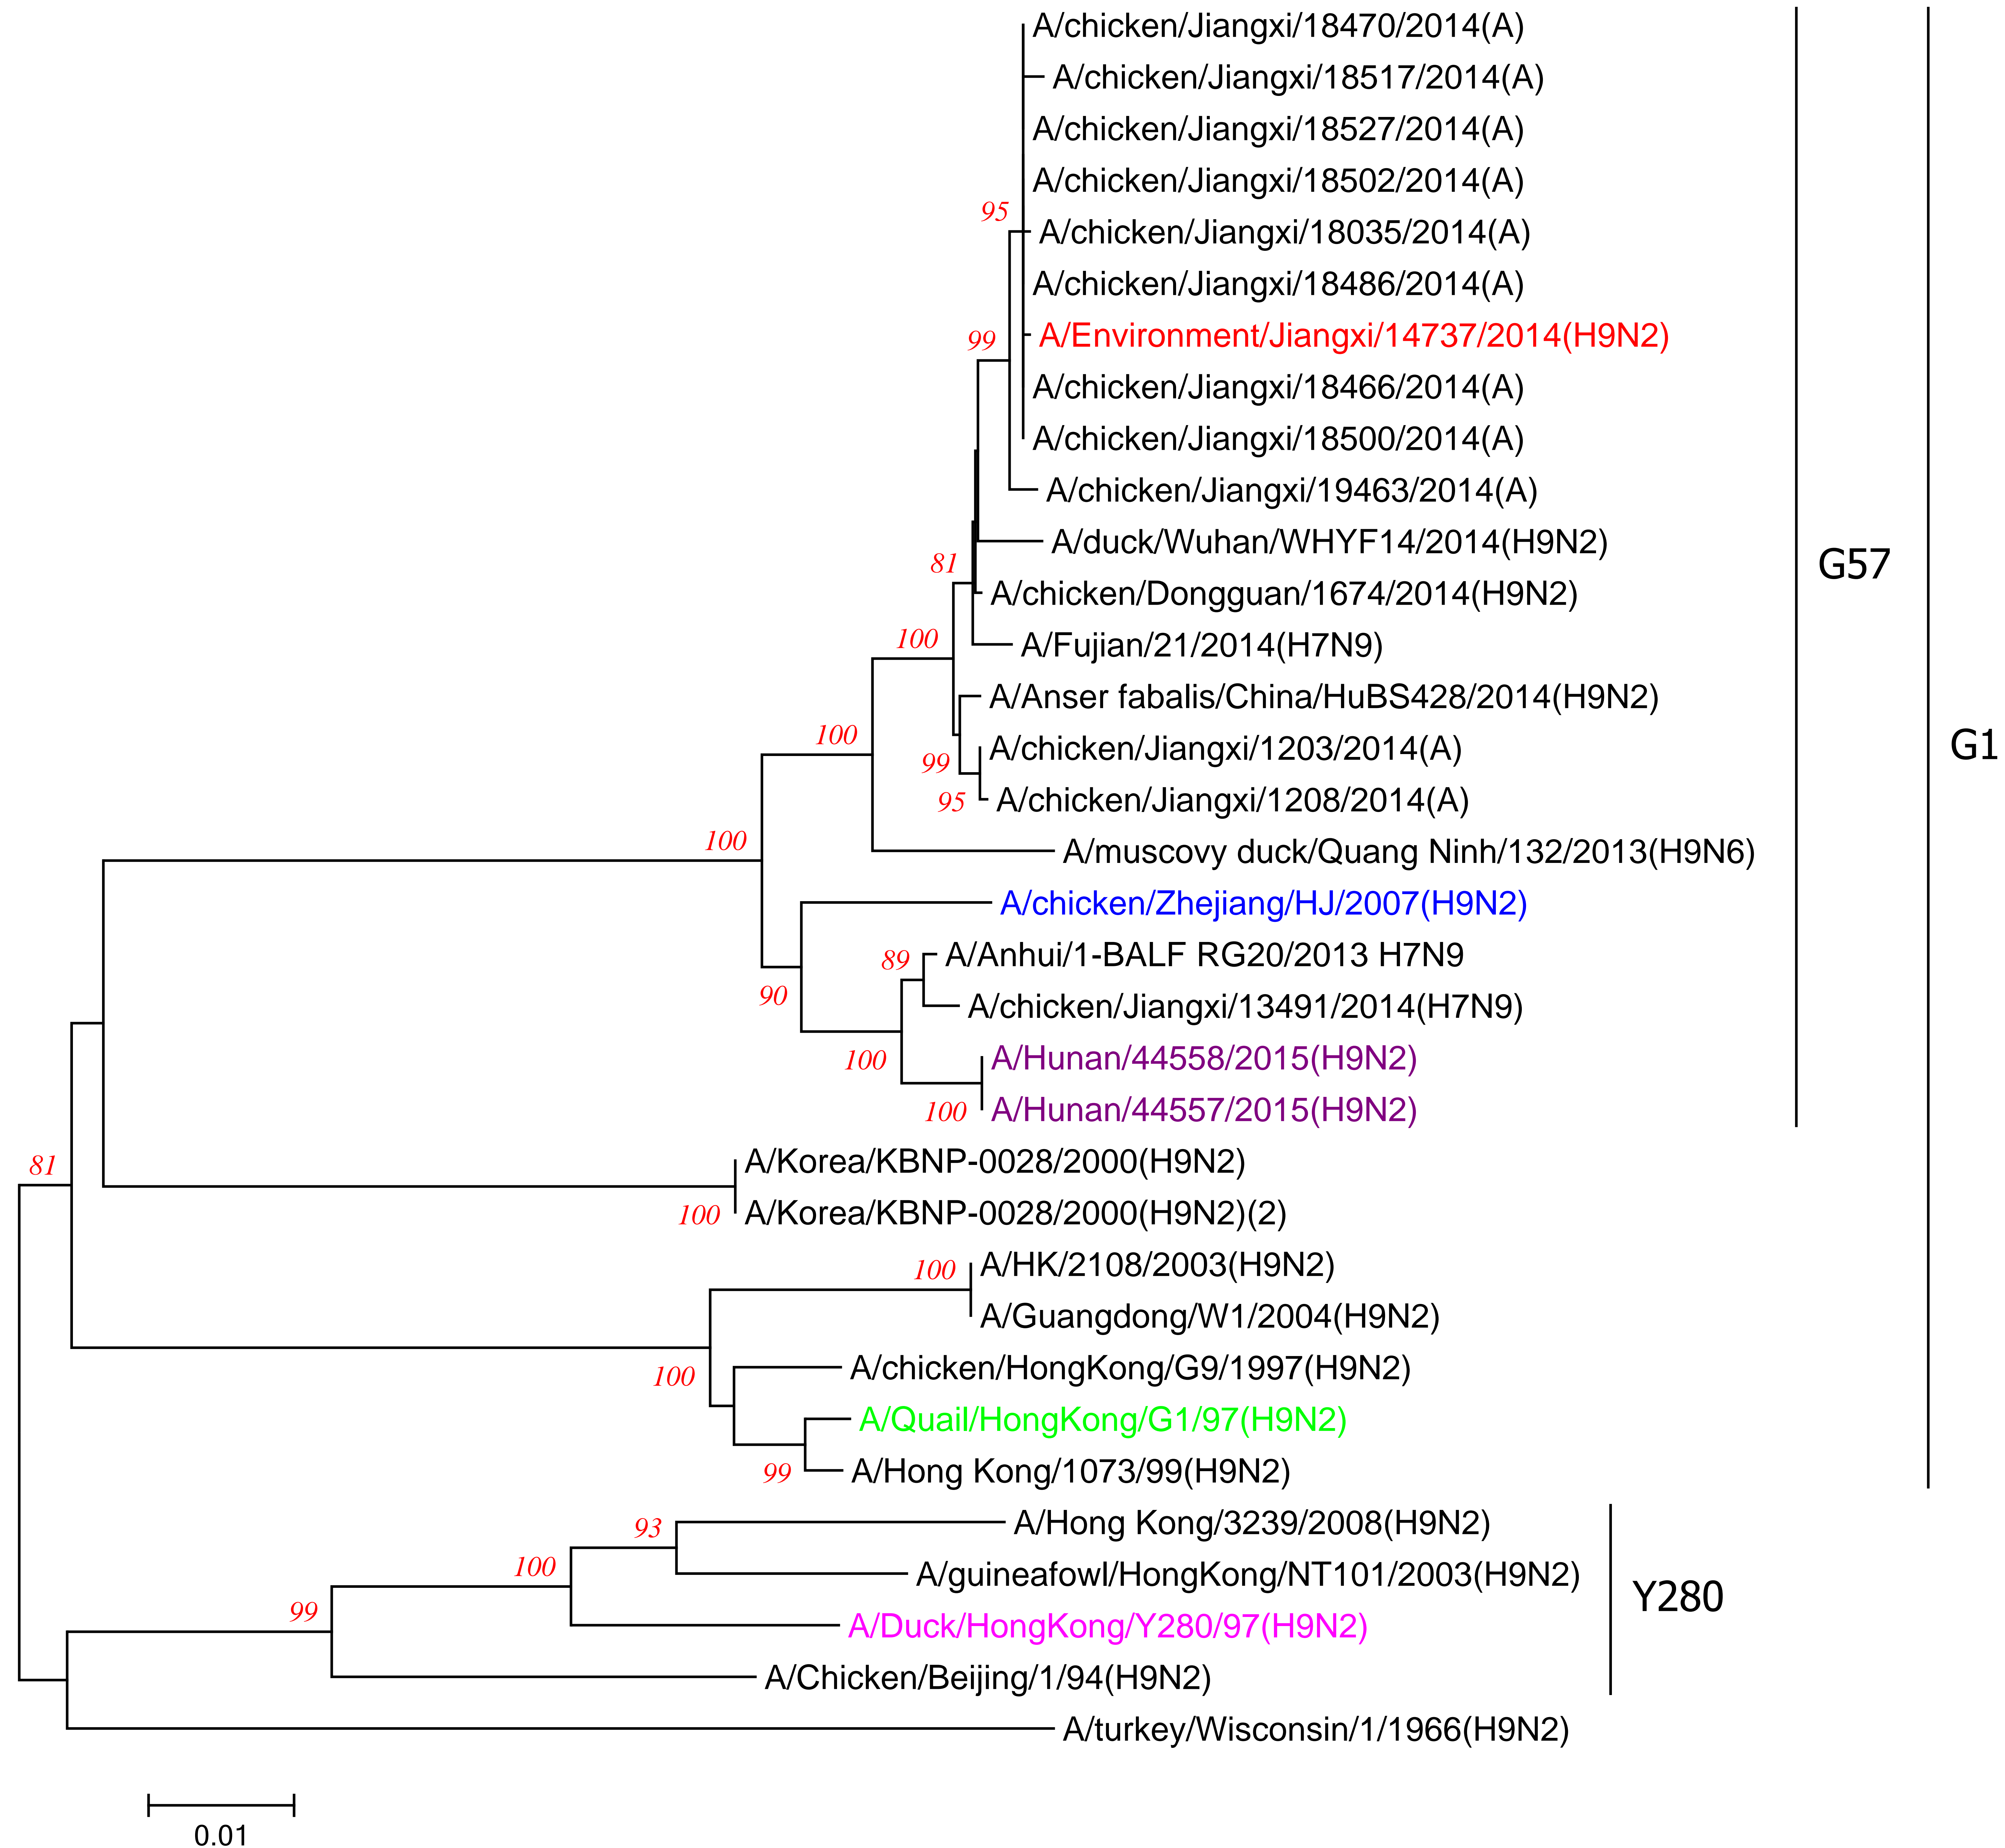

C

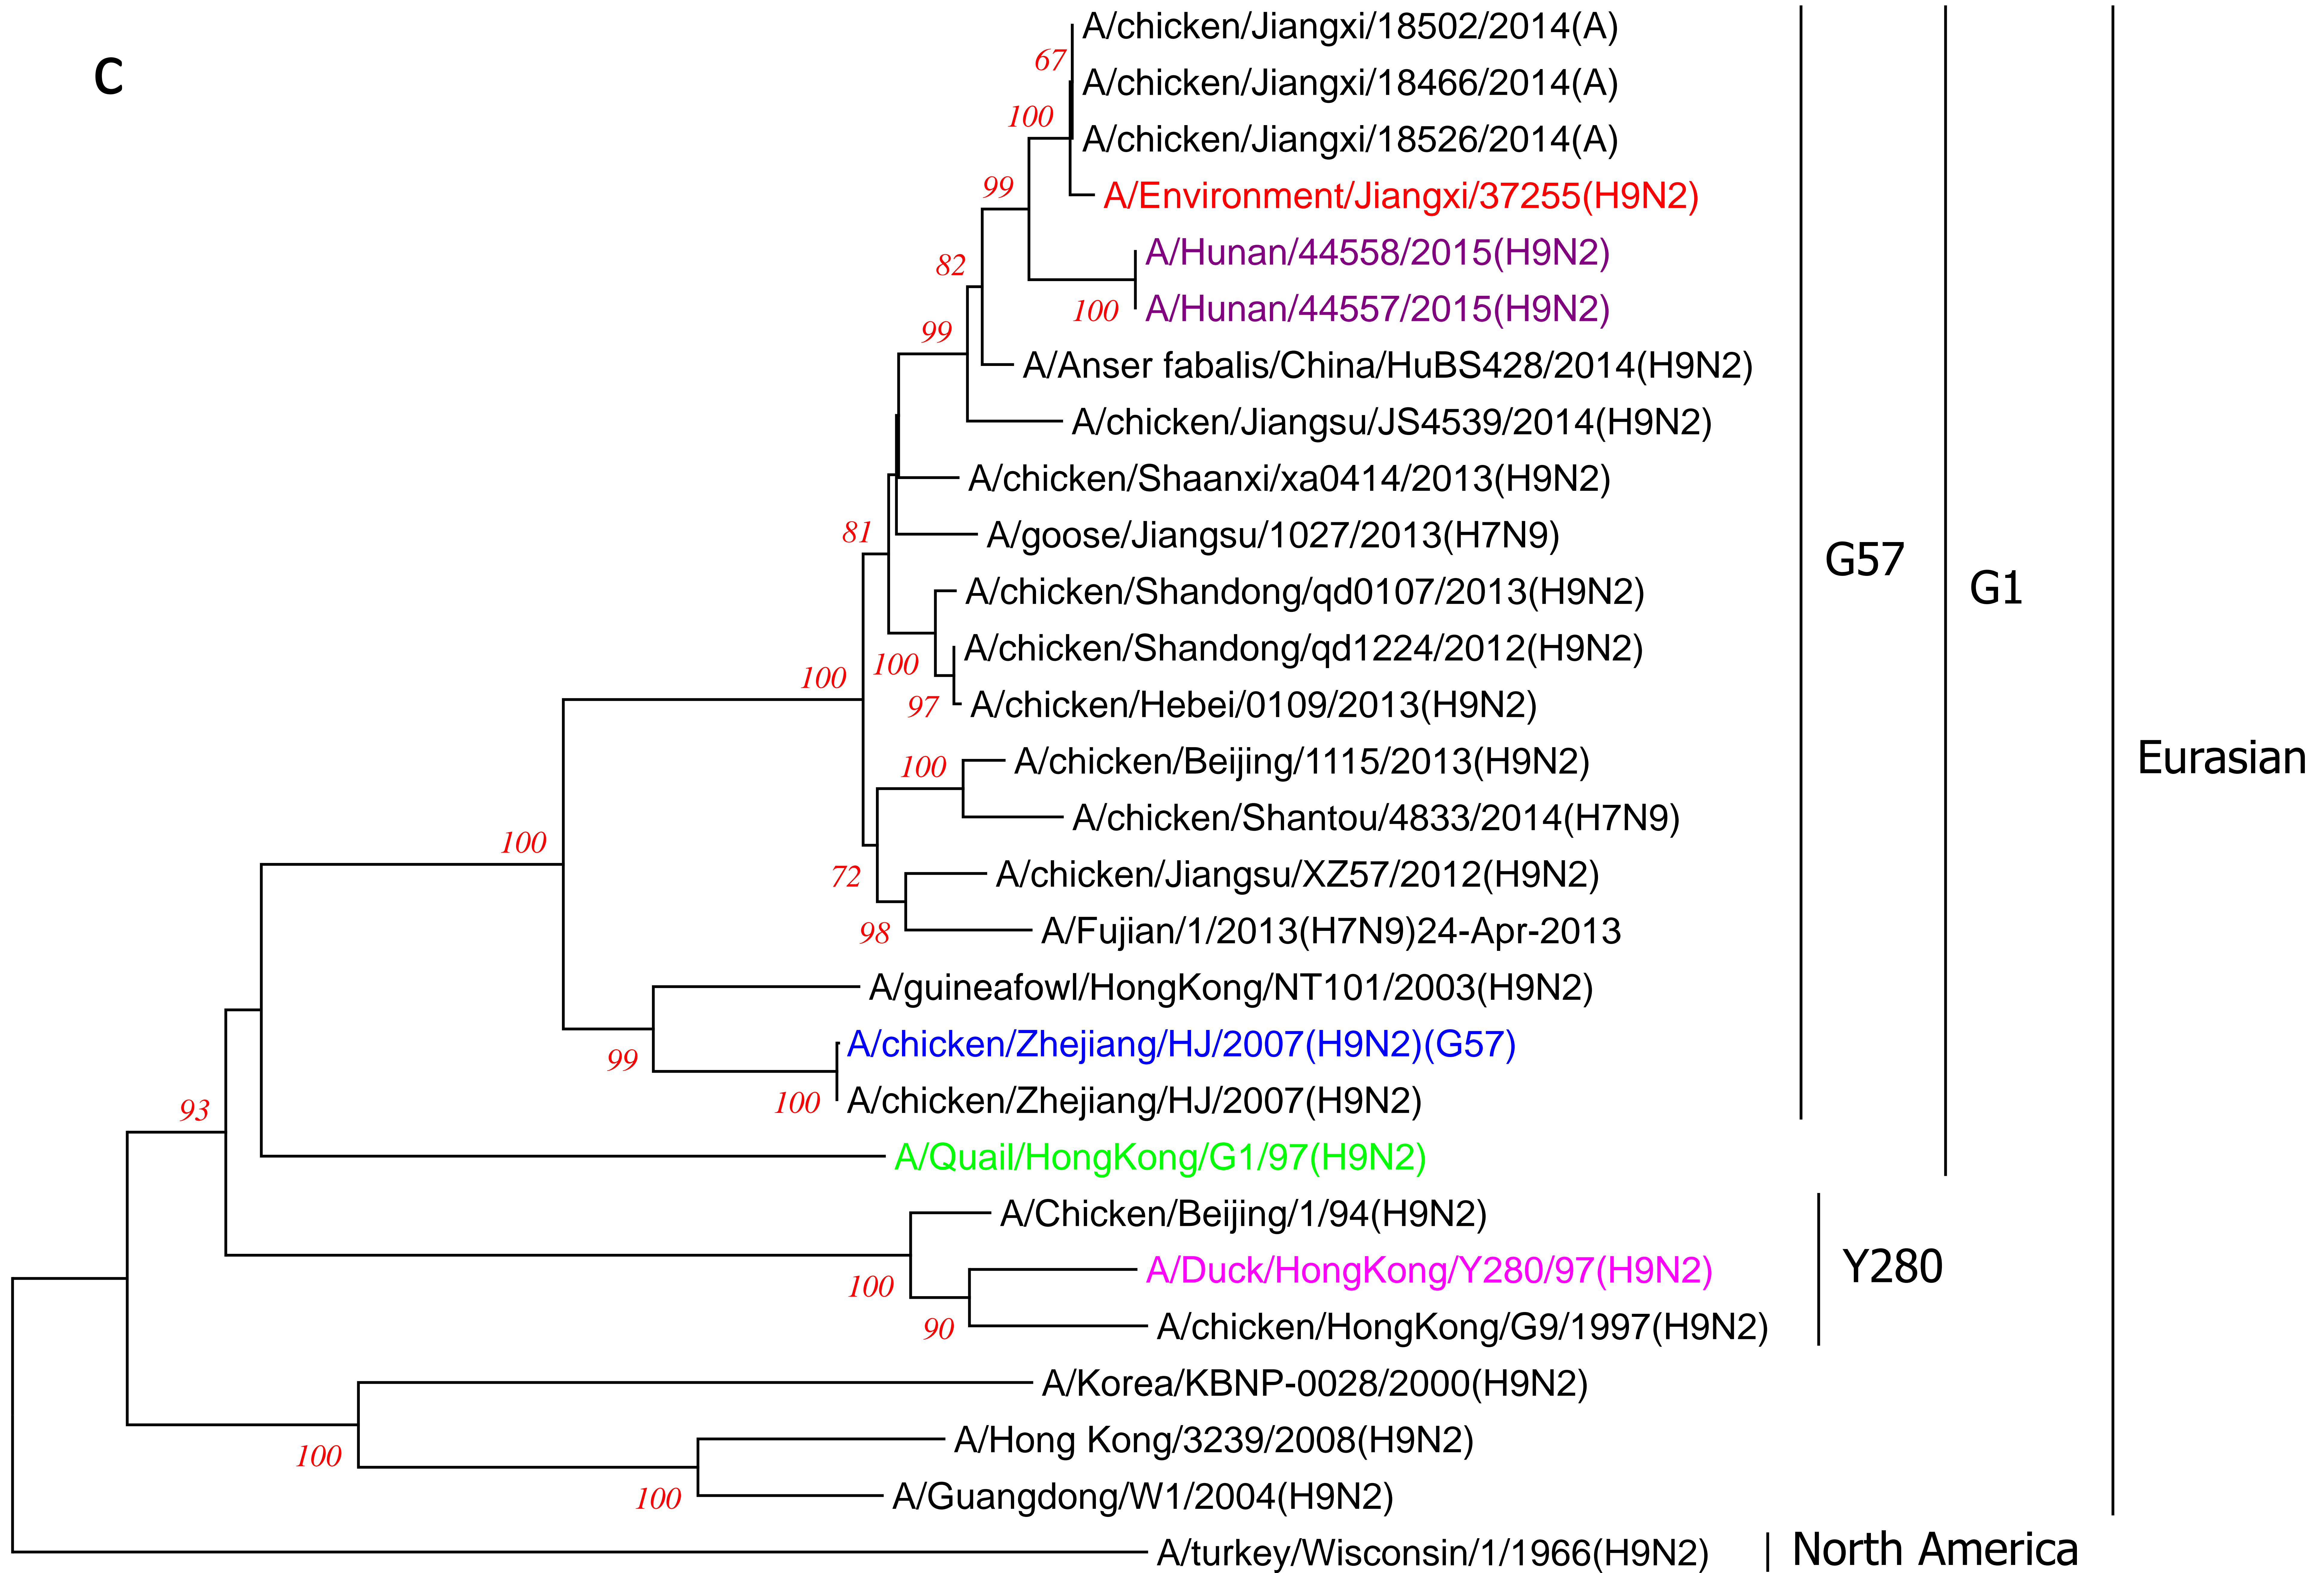

0.02

d

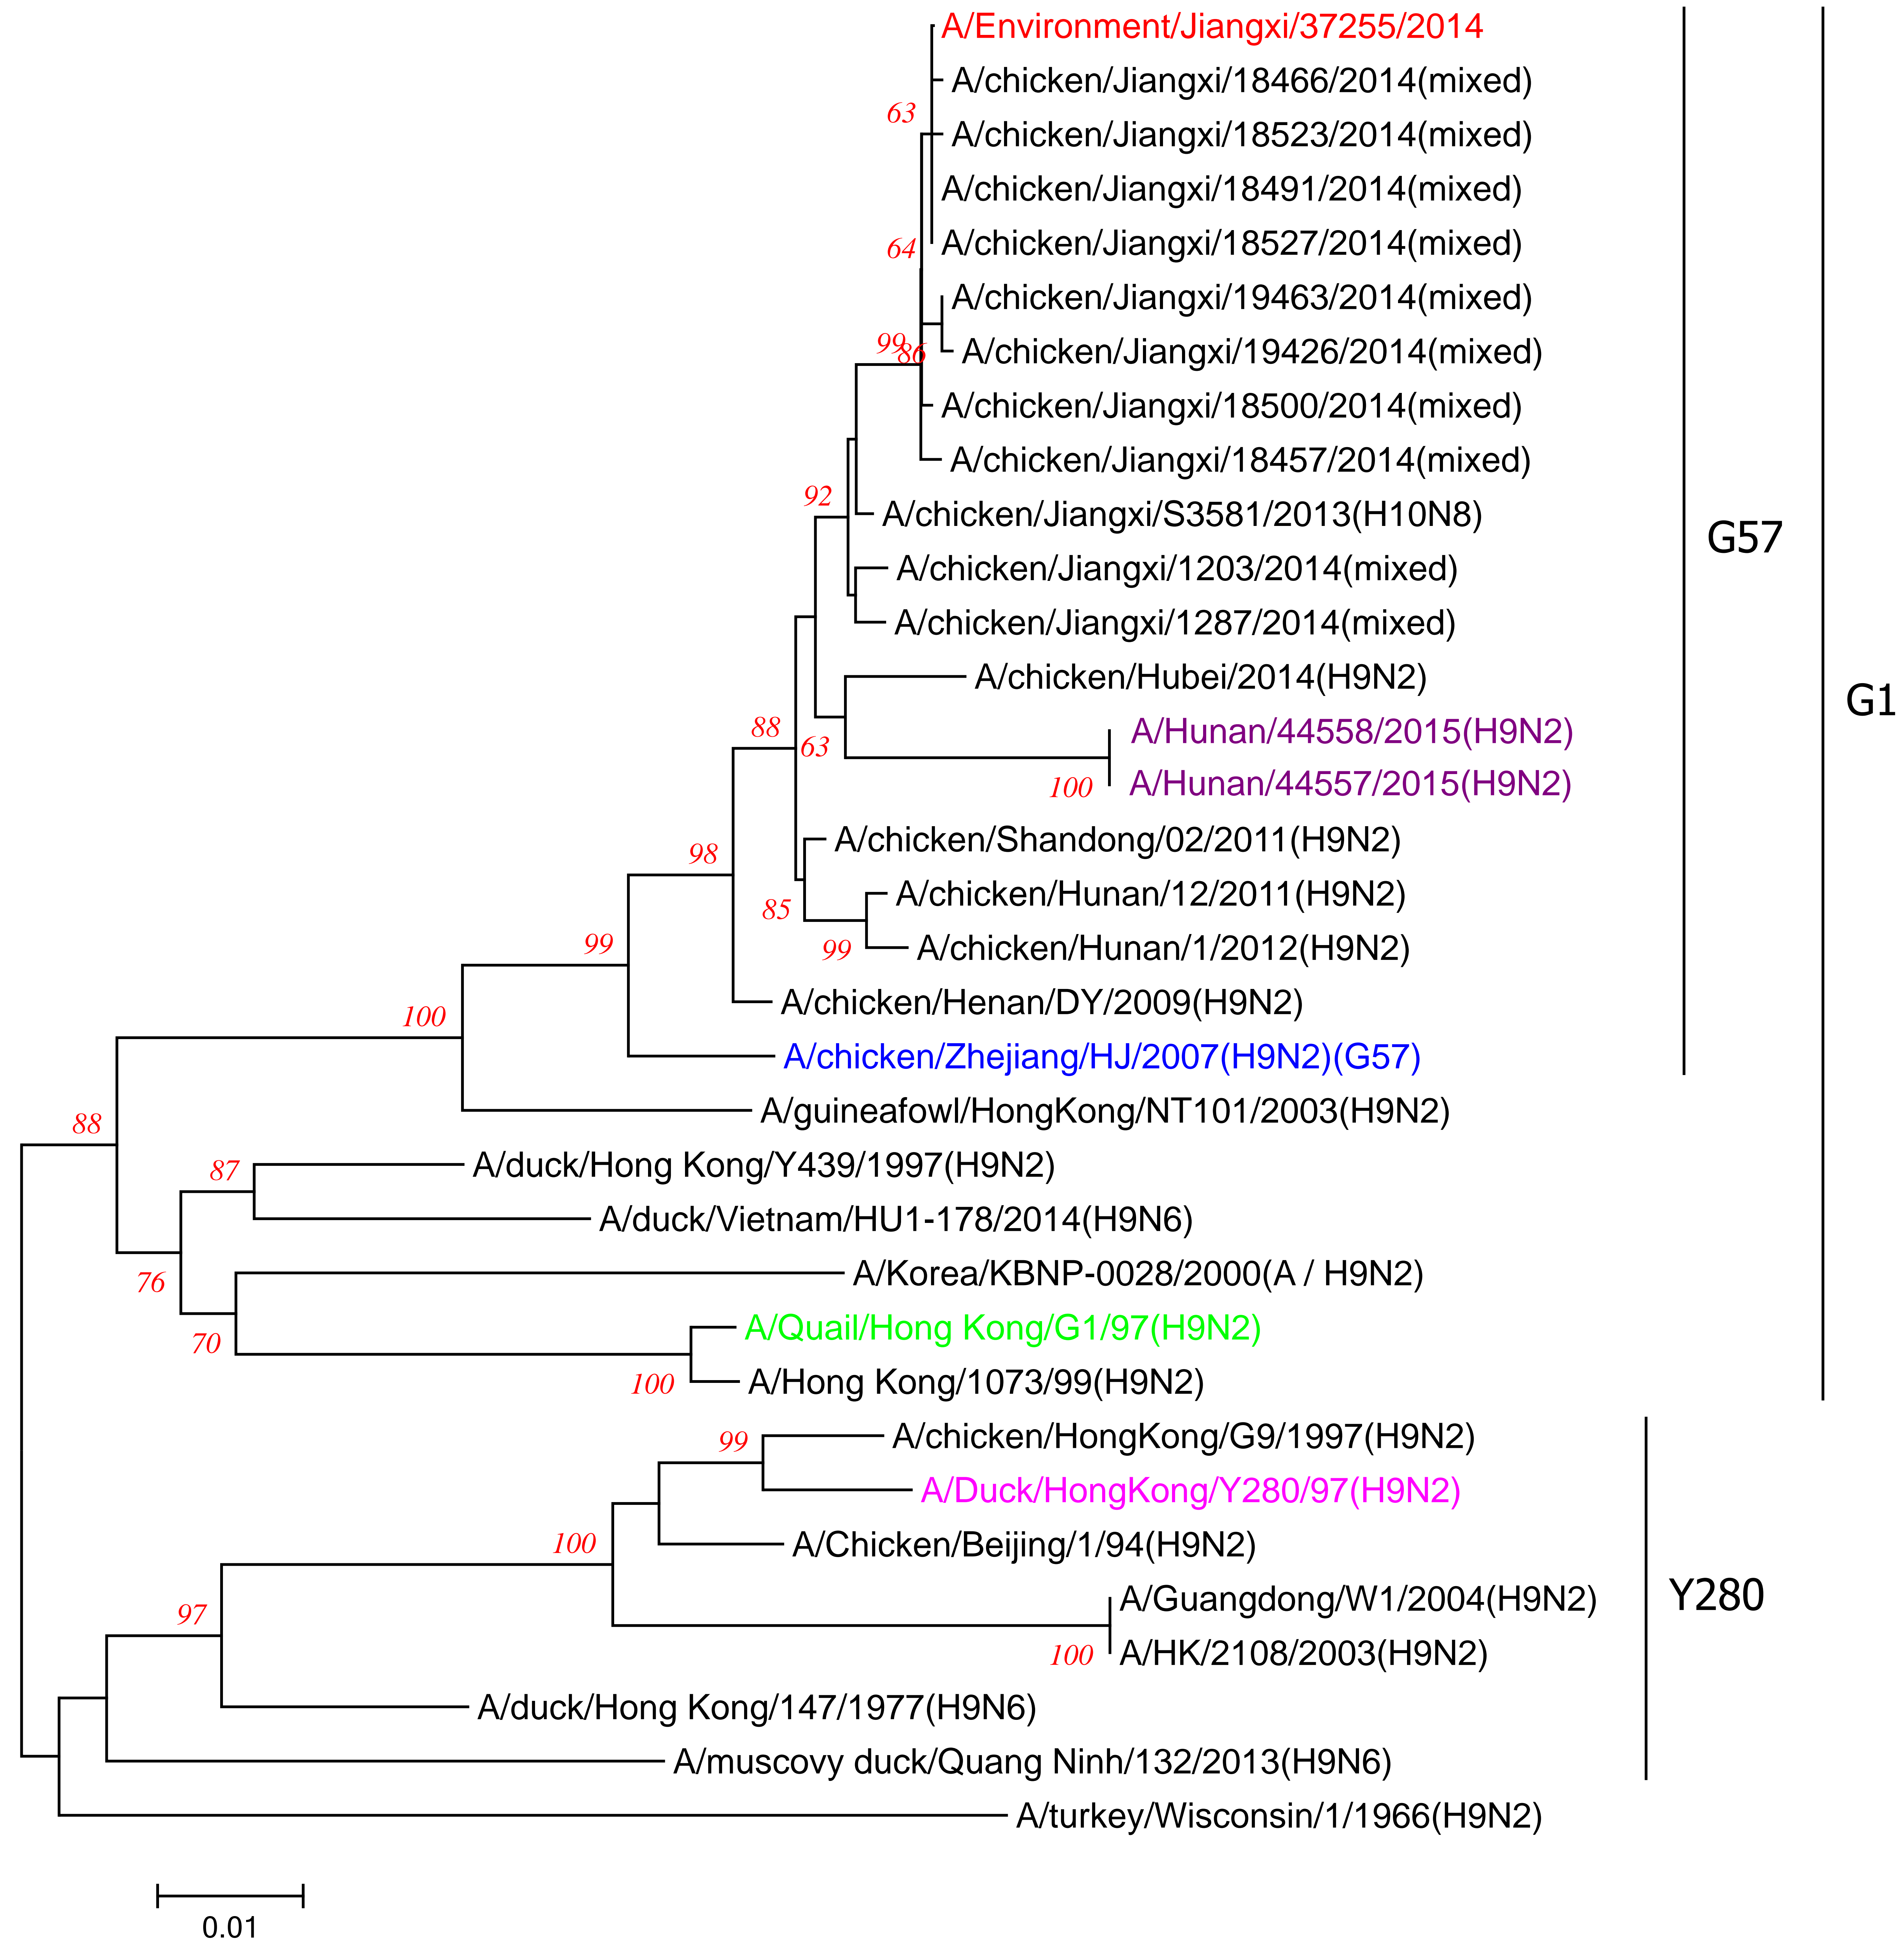

e

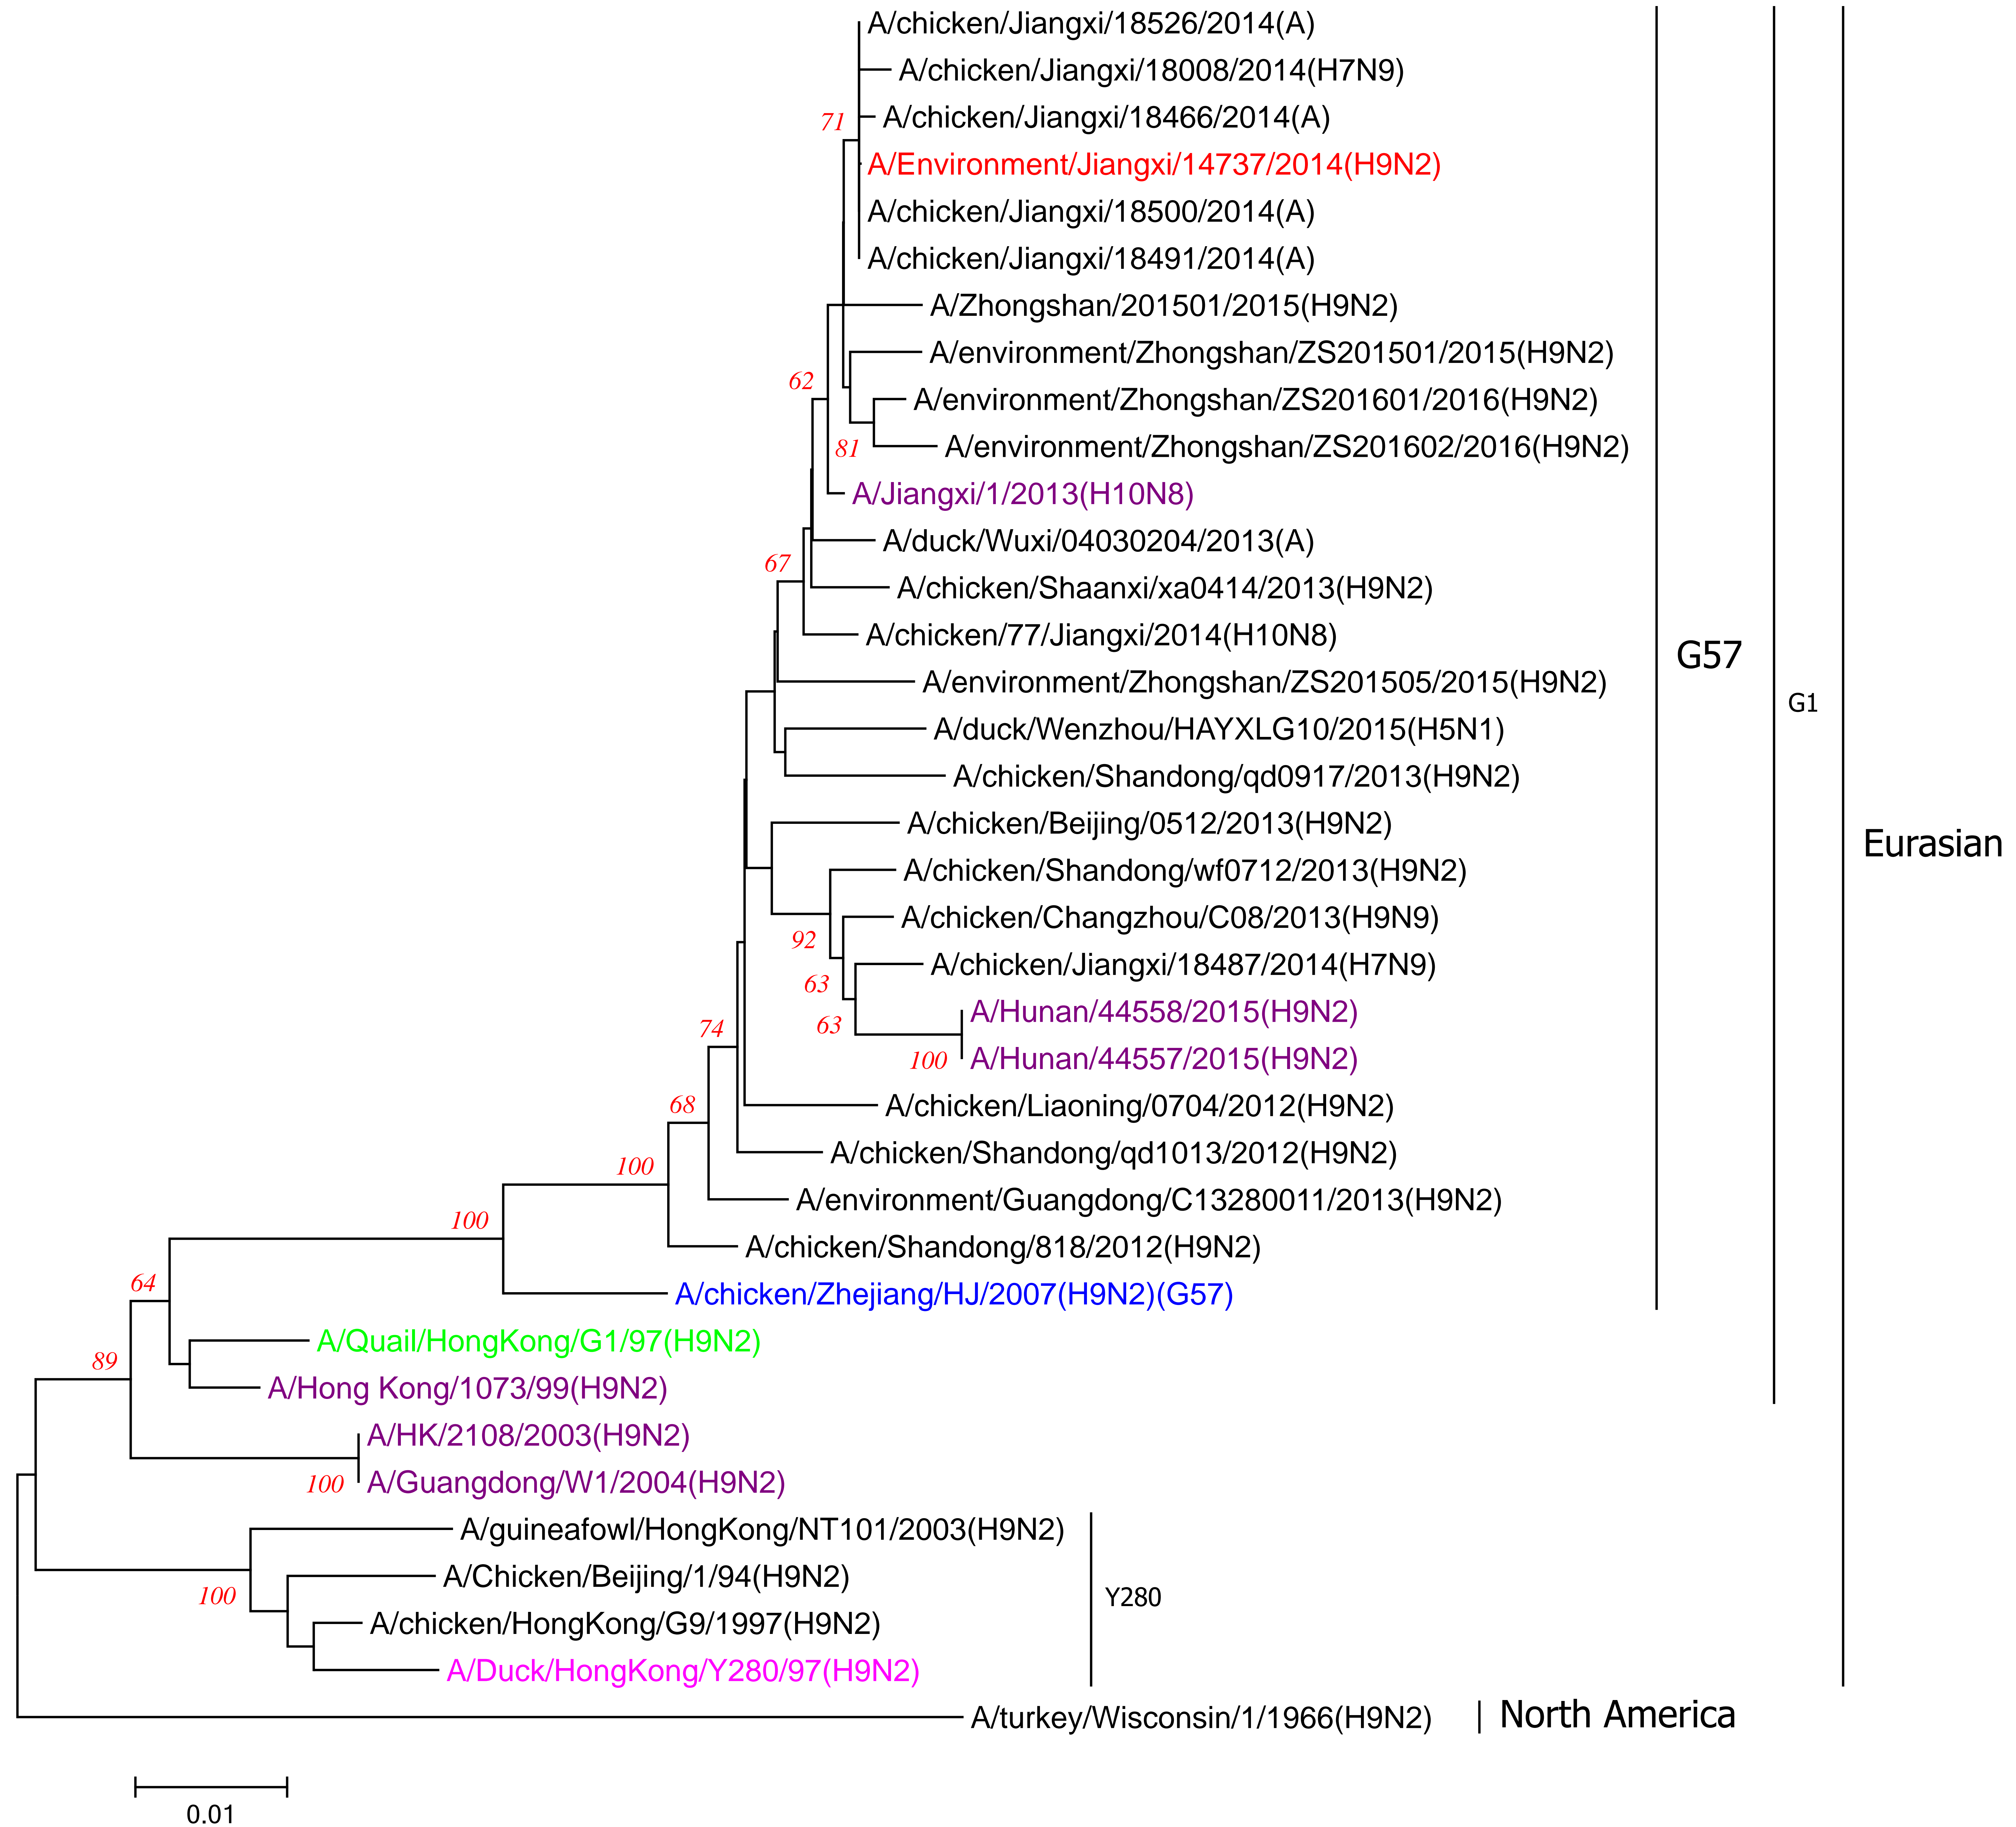

f

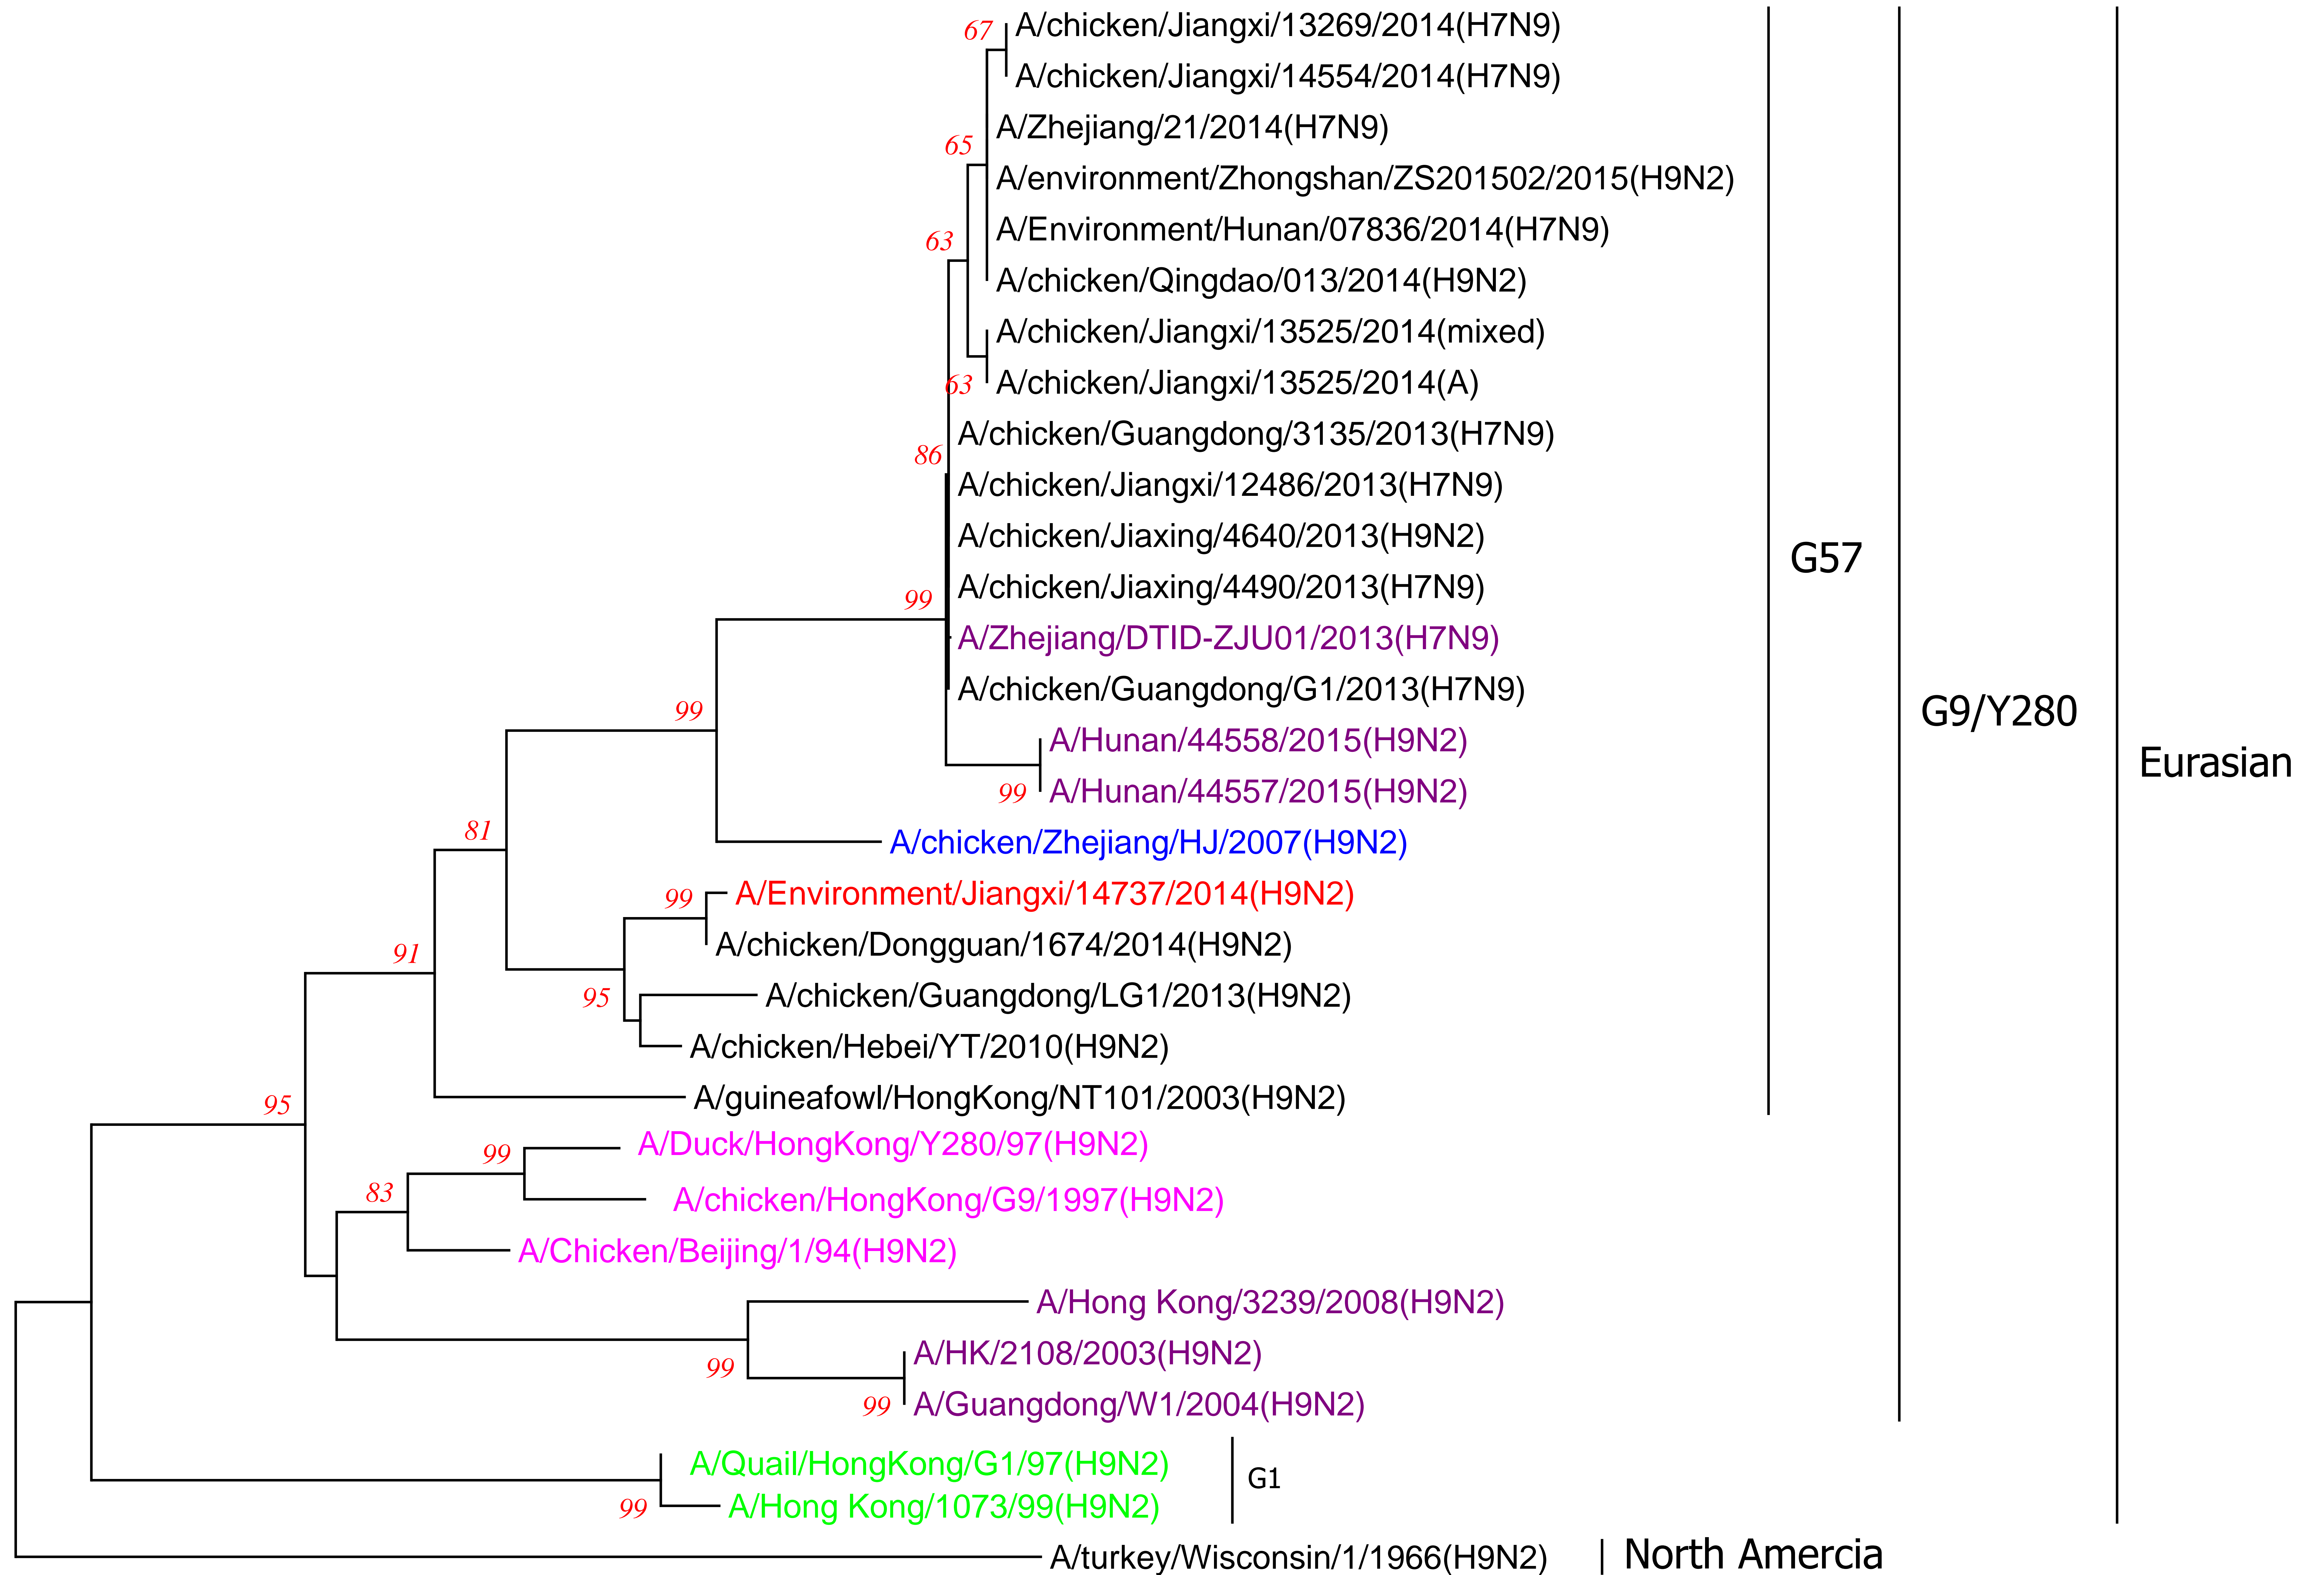

Supplement: MOESM1 [file 13324066]
